# Supplementary figures and images for: Glycosylation of Stilbene Compounds by Cultured Plant Cells
Source: MDPI journal article supplement (doi:10.3390/molecules25061437), 2020-03-22

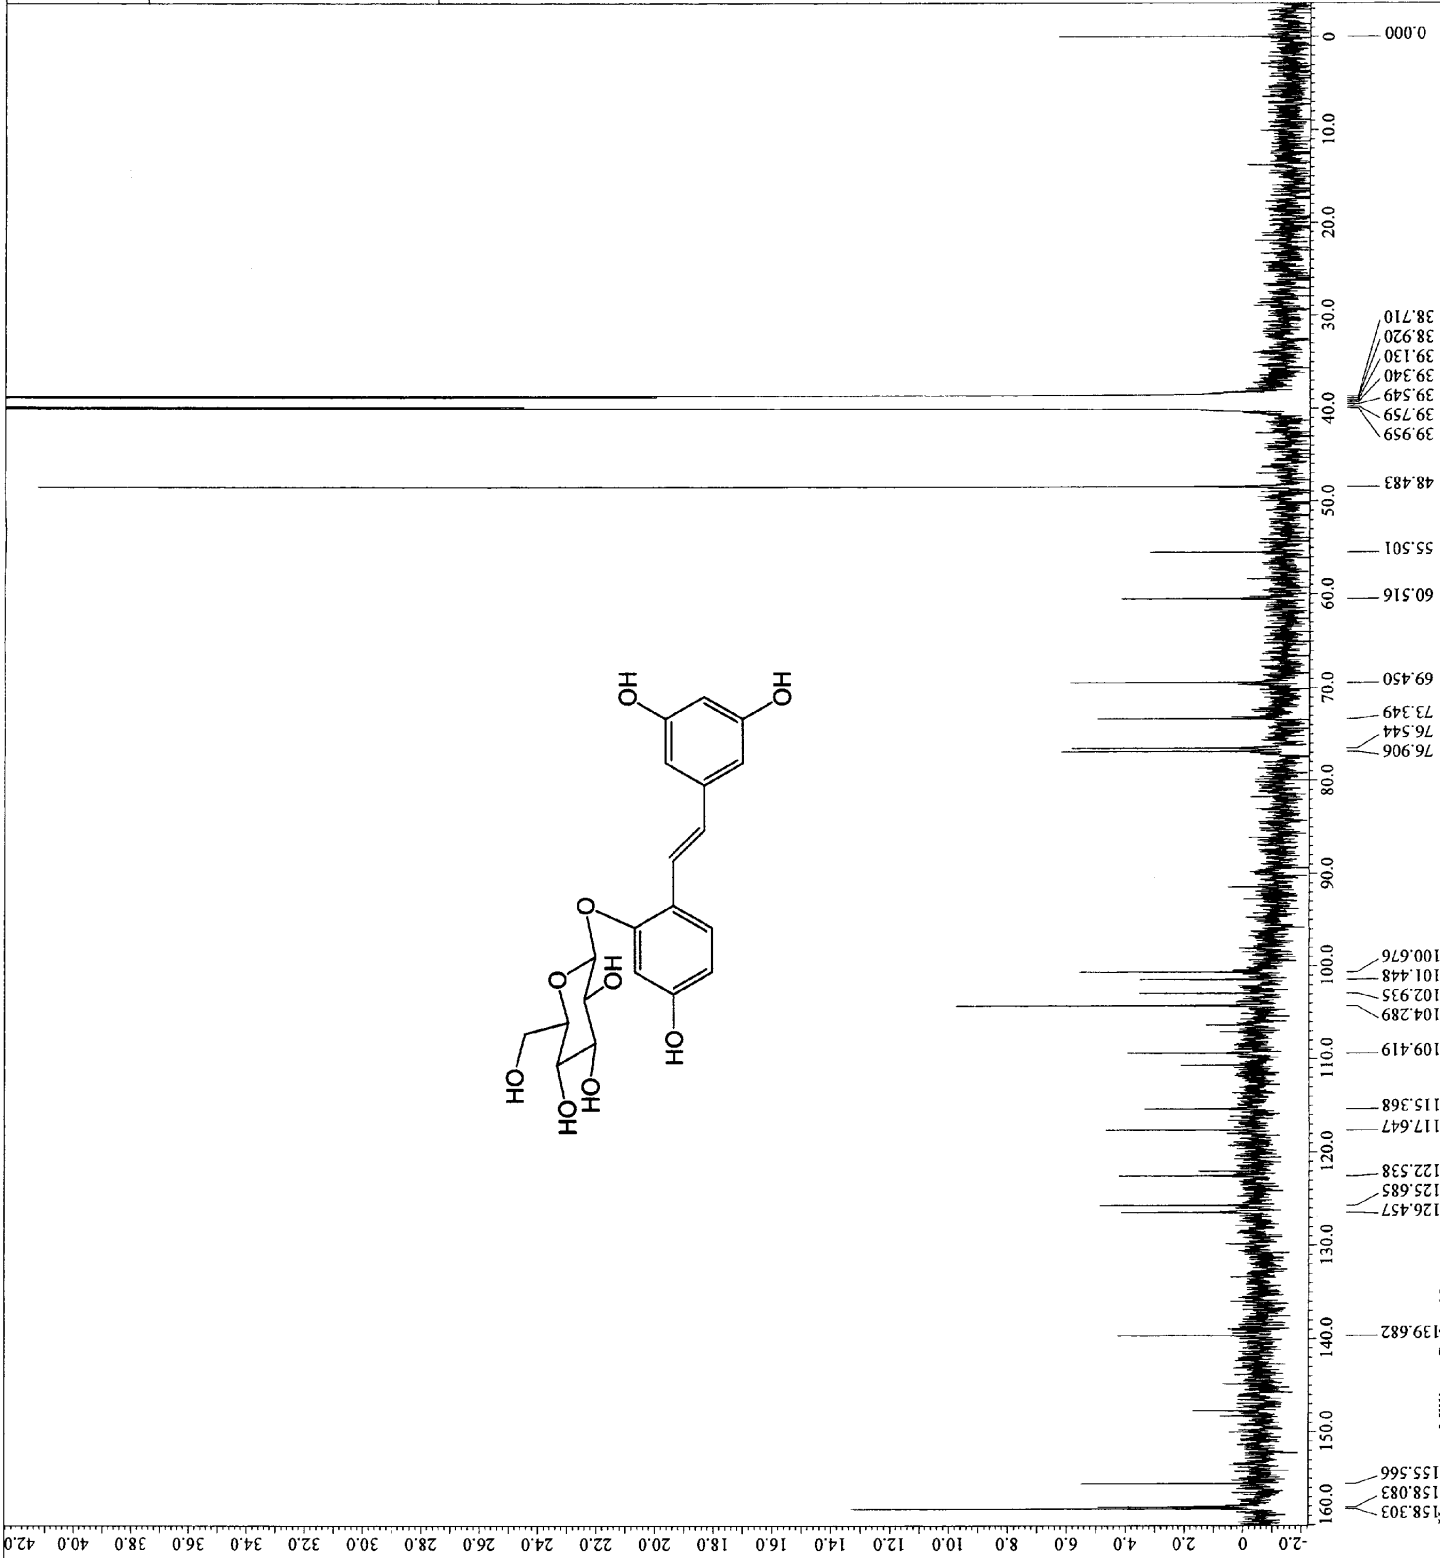

Supplement: s1 [file s1]

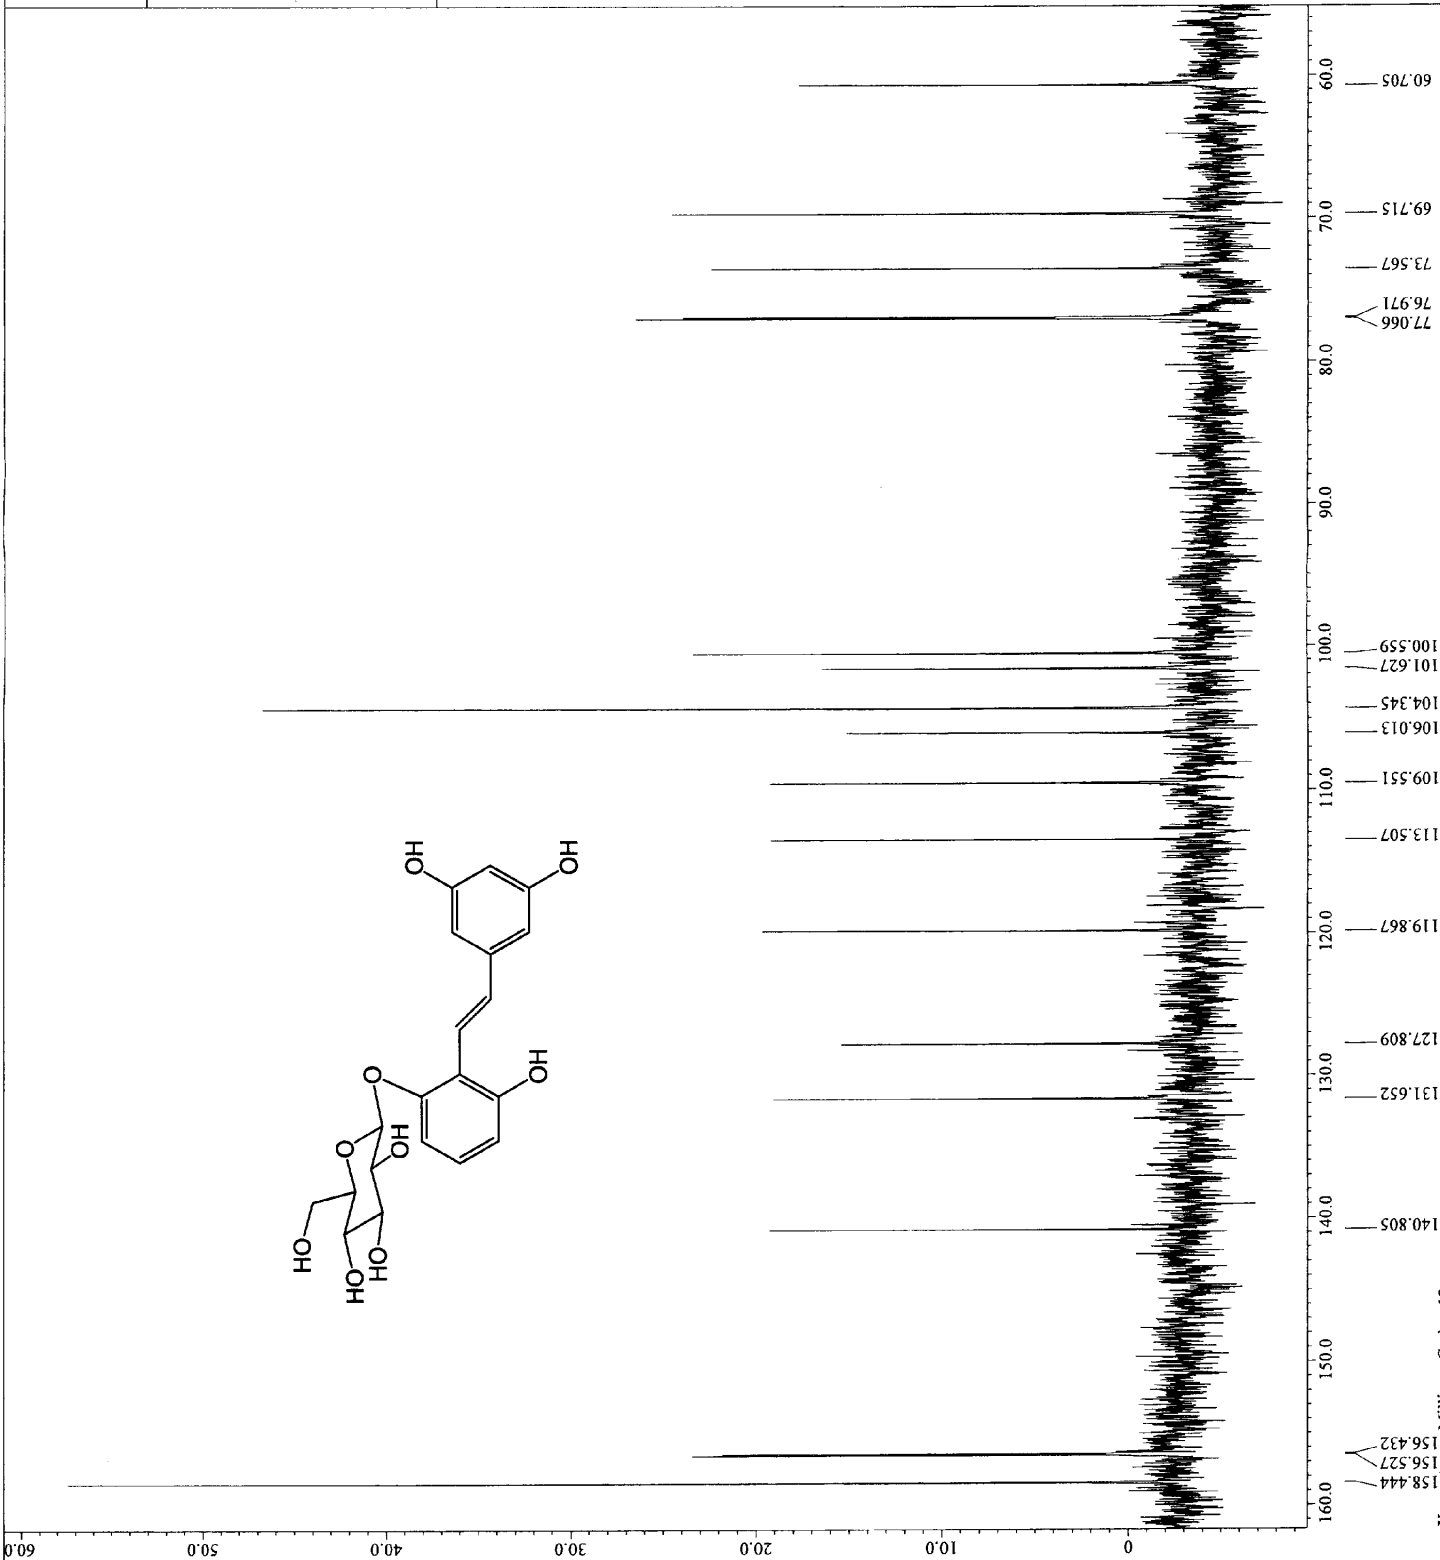

Supplement: s1 [file s1]

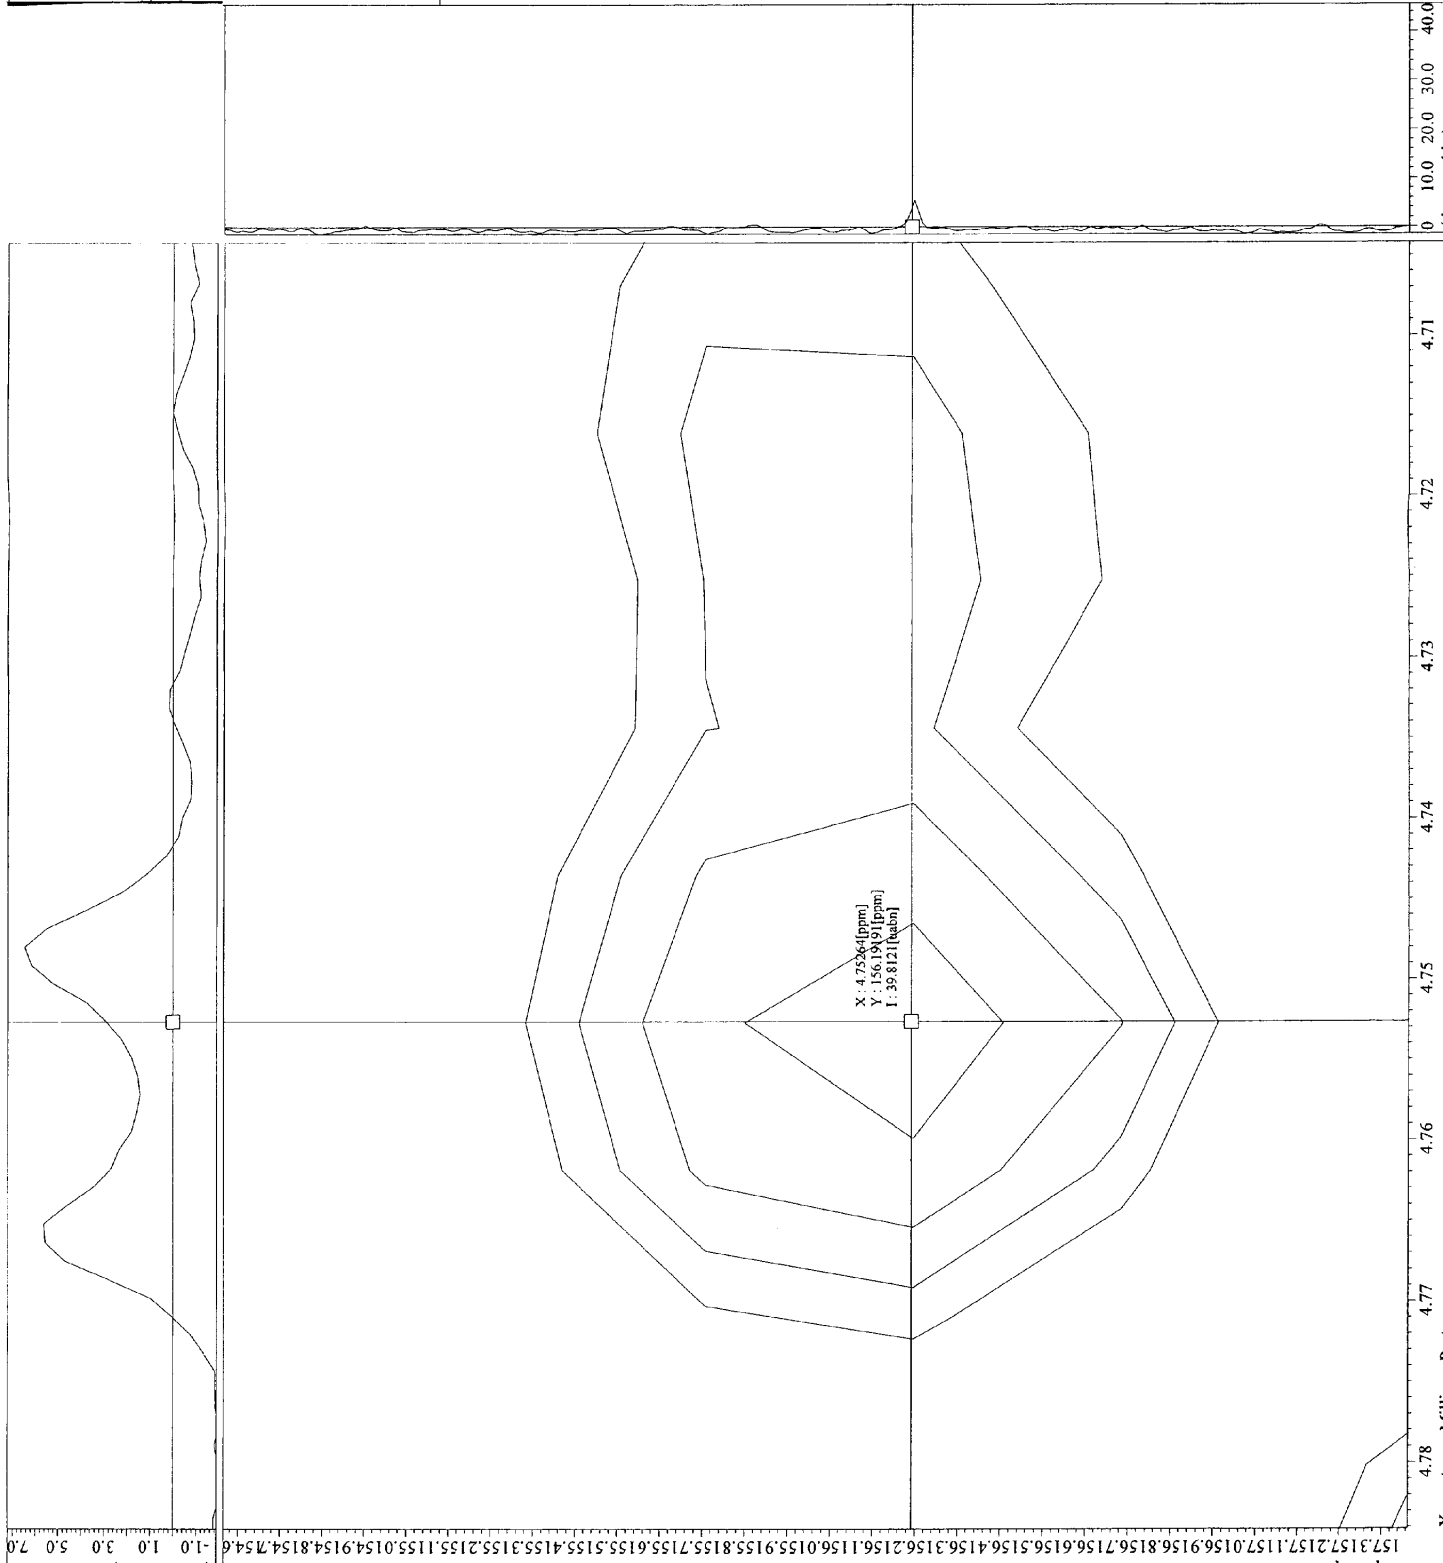

Supplement: s1 [file s1]

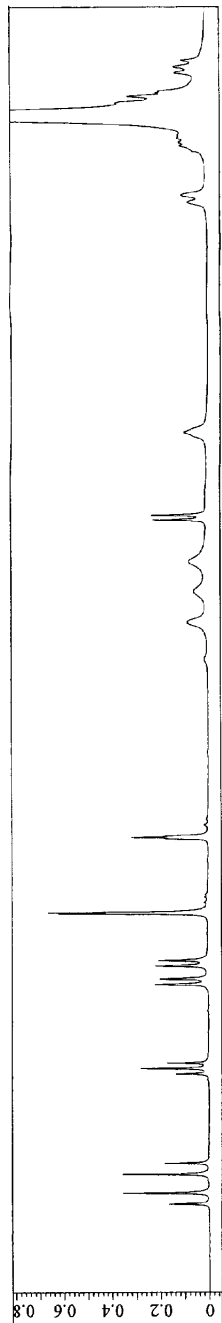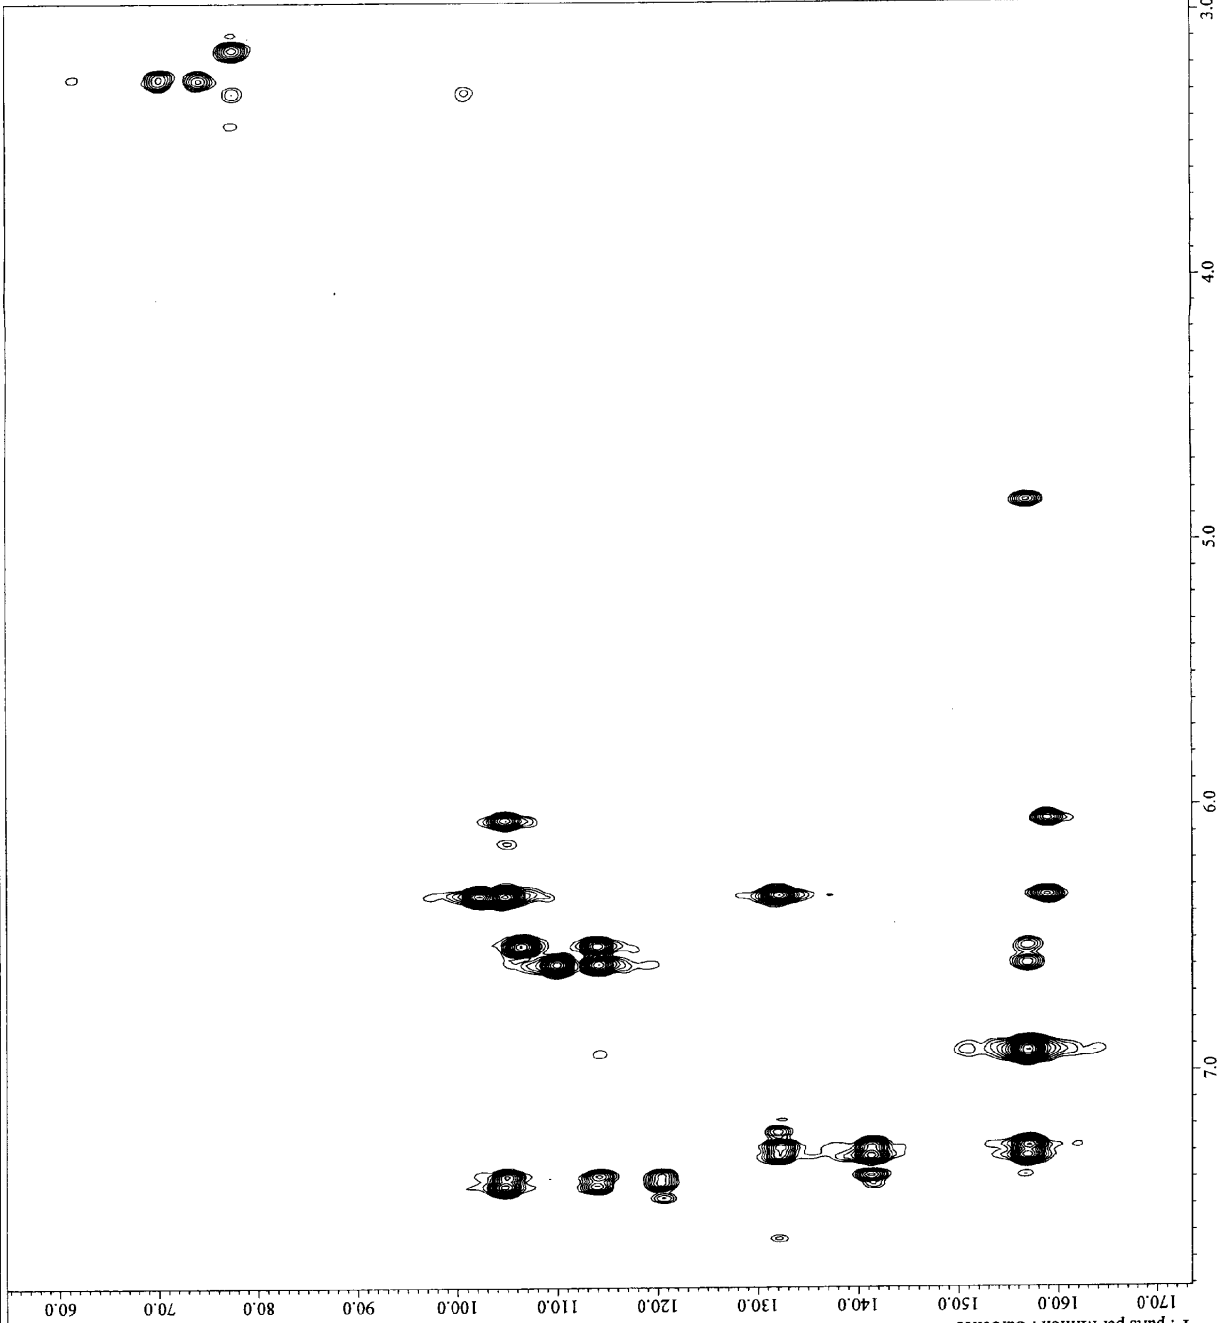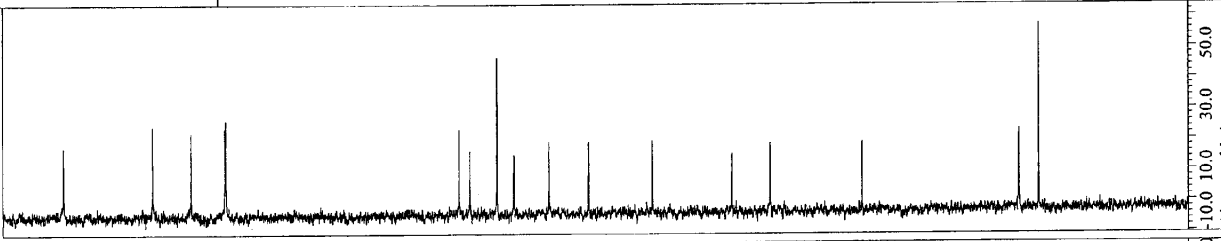

Supplement: s1 [file s1]

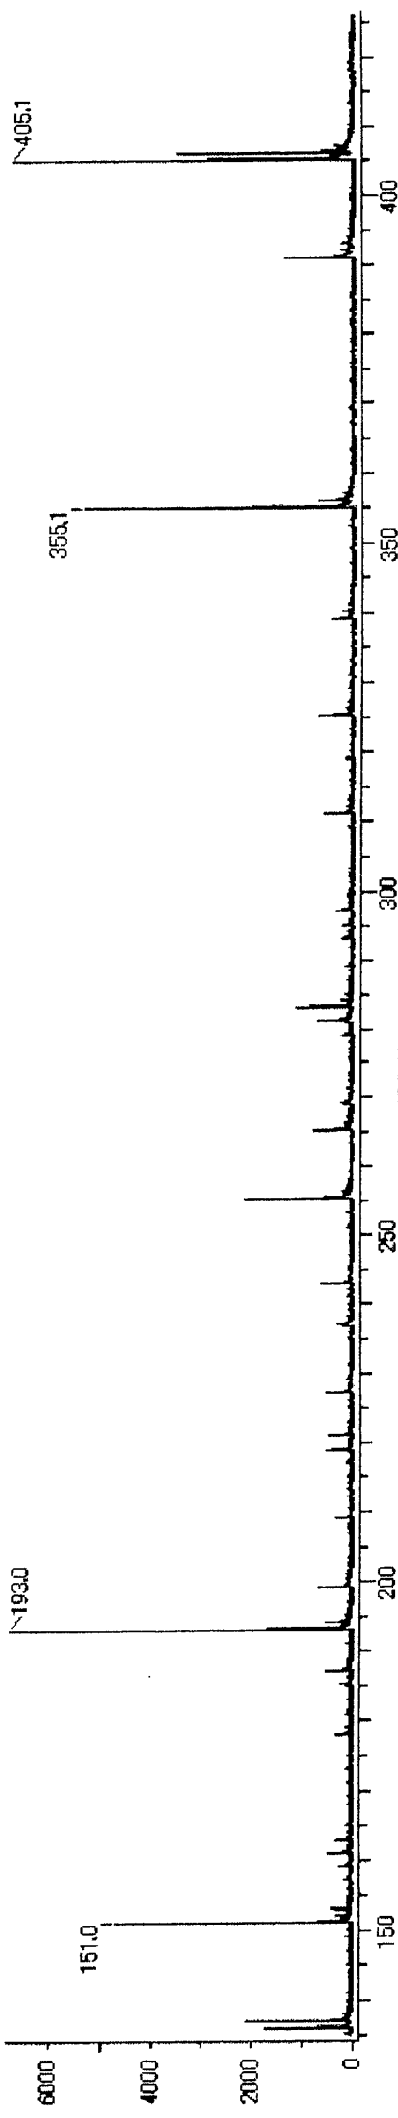

Supplement: s1 [file s1]

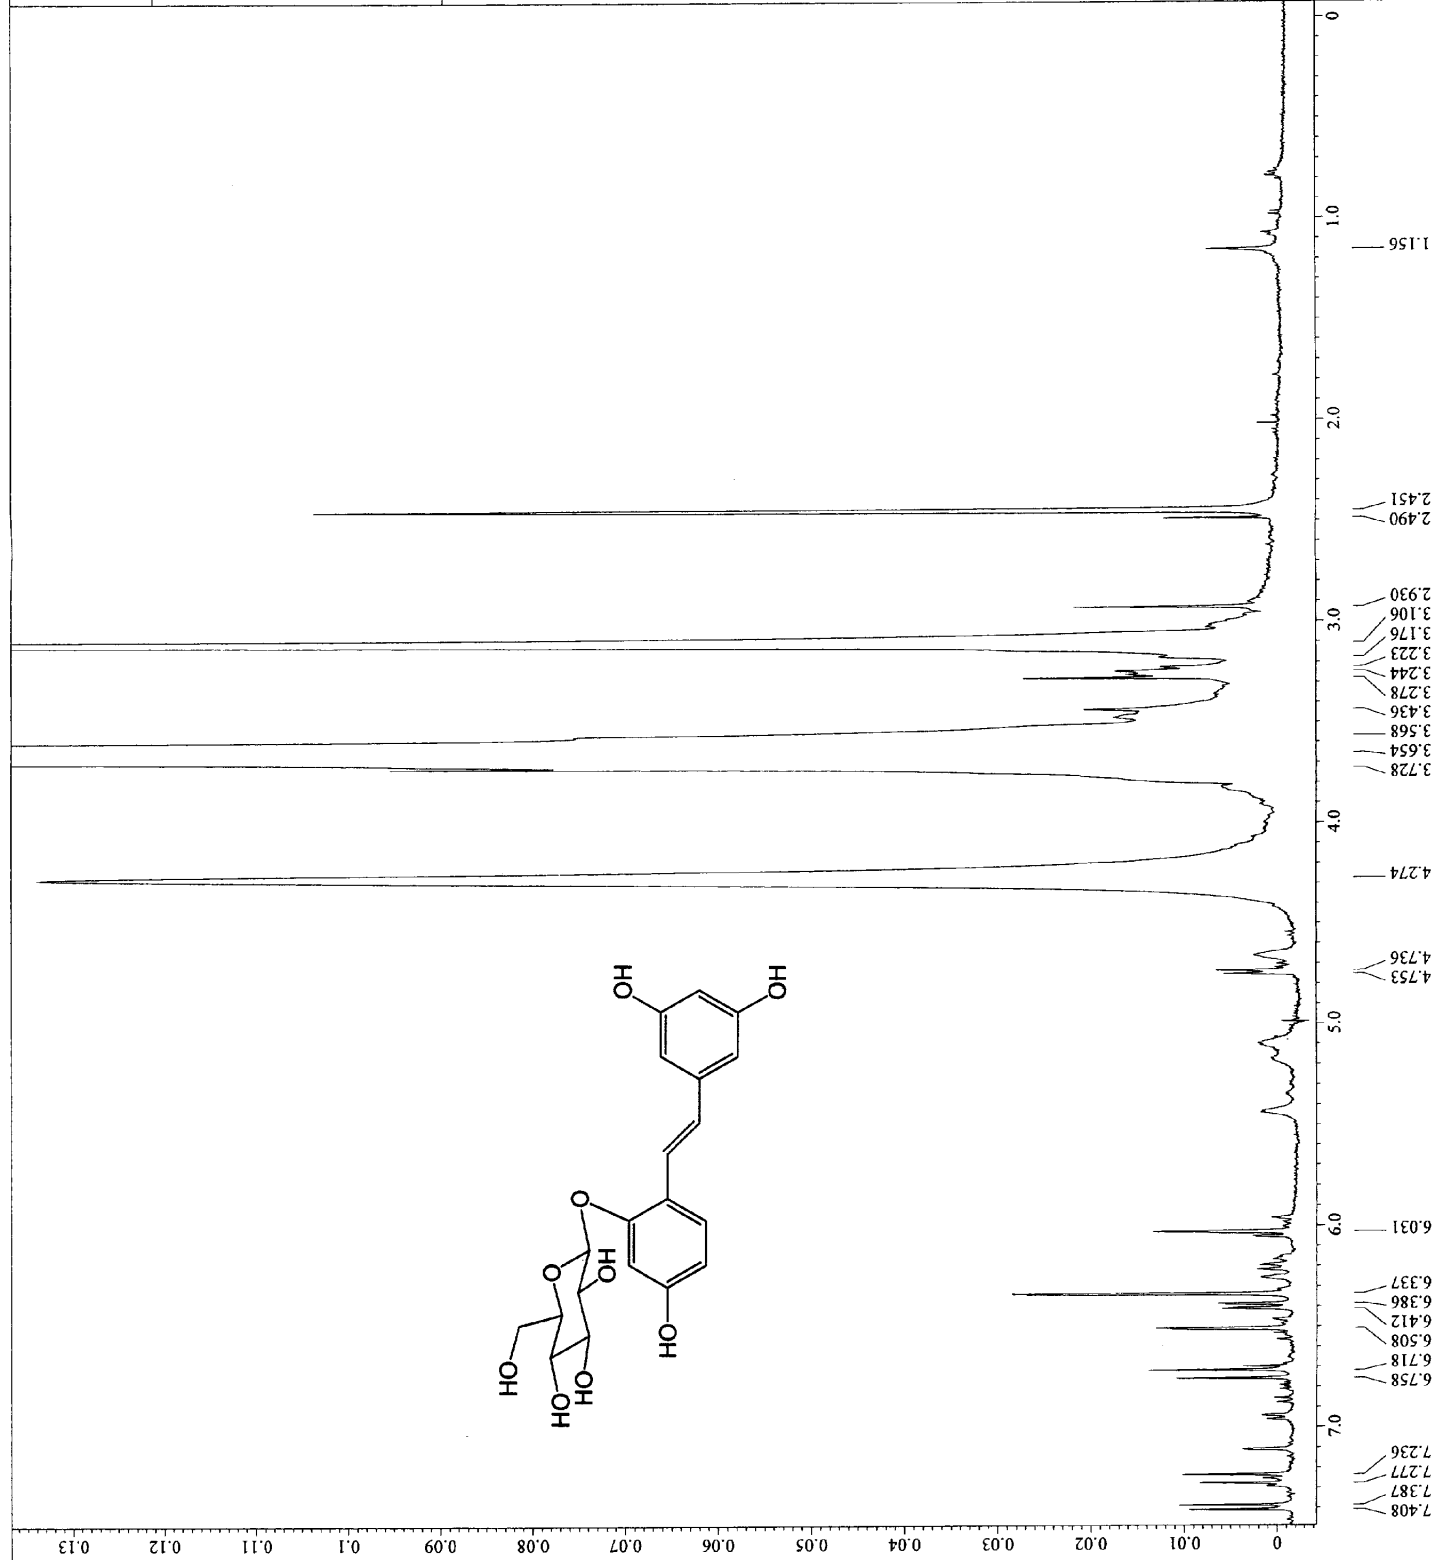

Supplement: s1 [file s1]

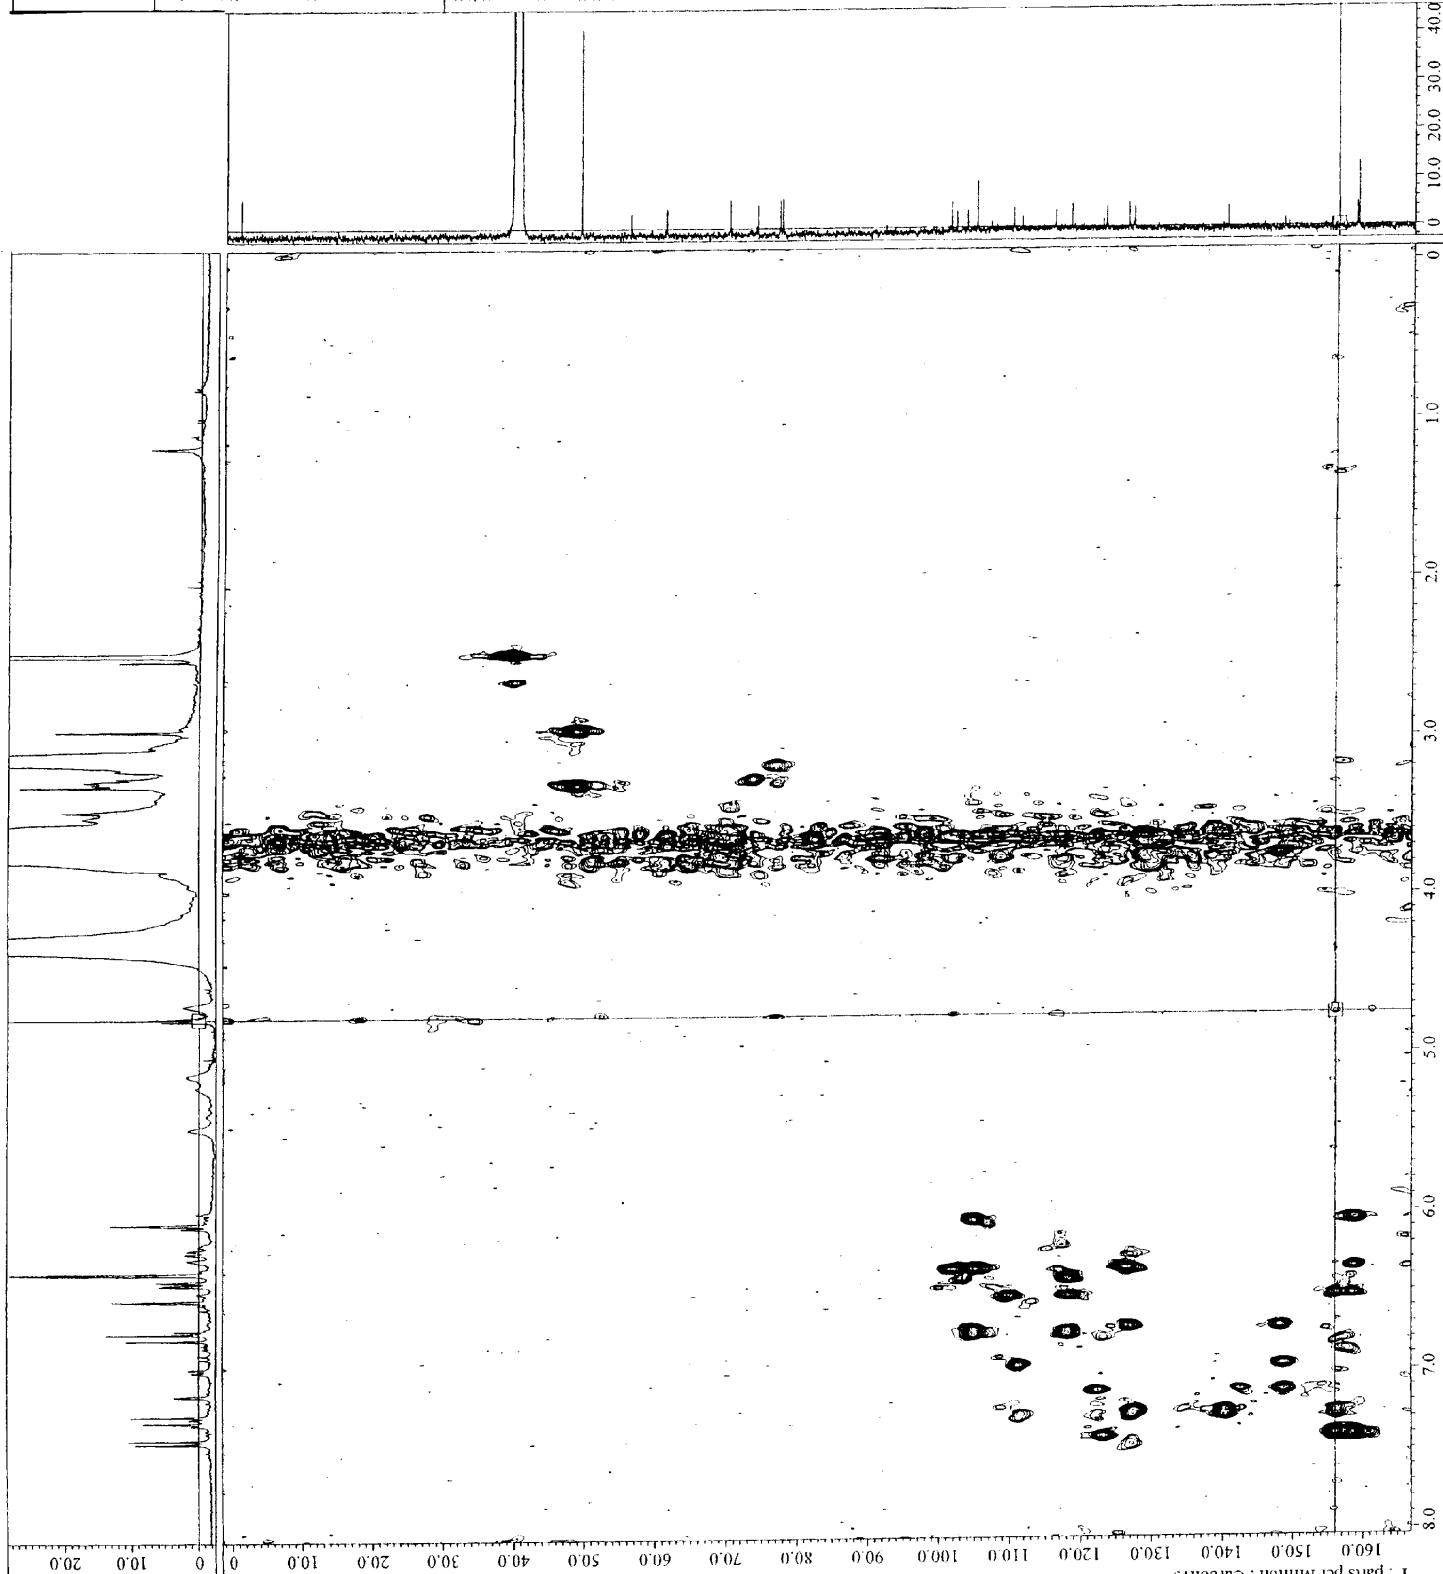

Supplement: s1 [file s1]

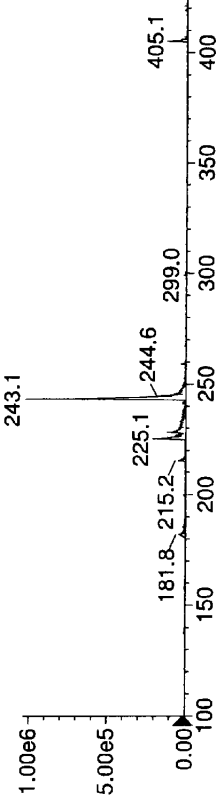

Supplement: s1 [file s1]

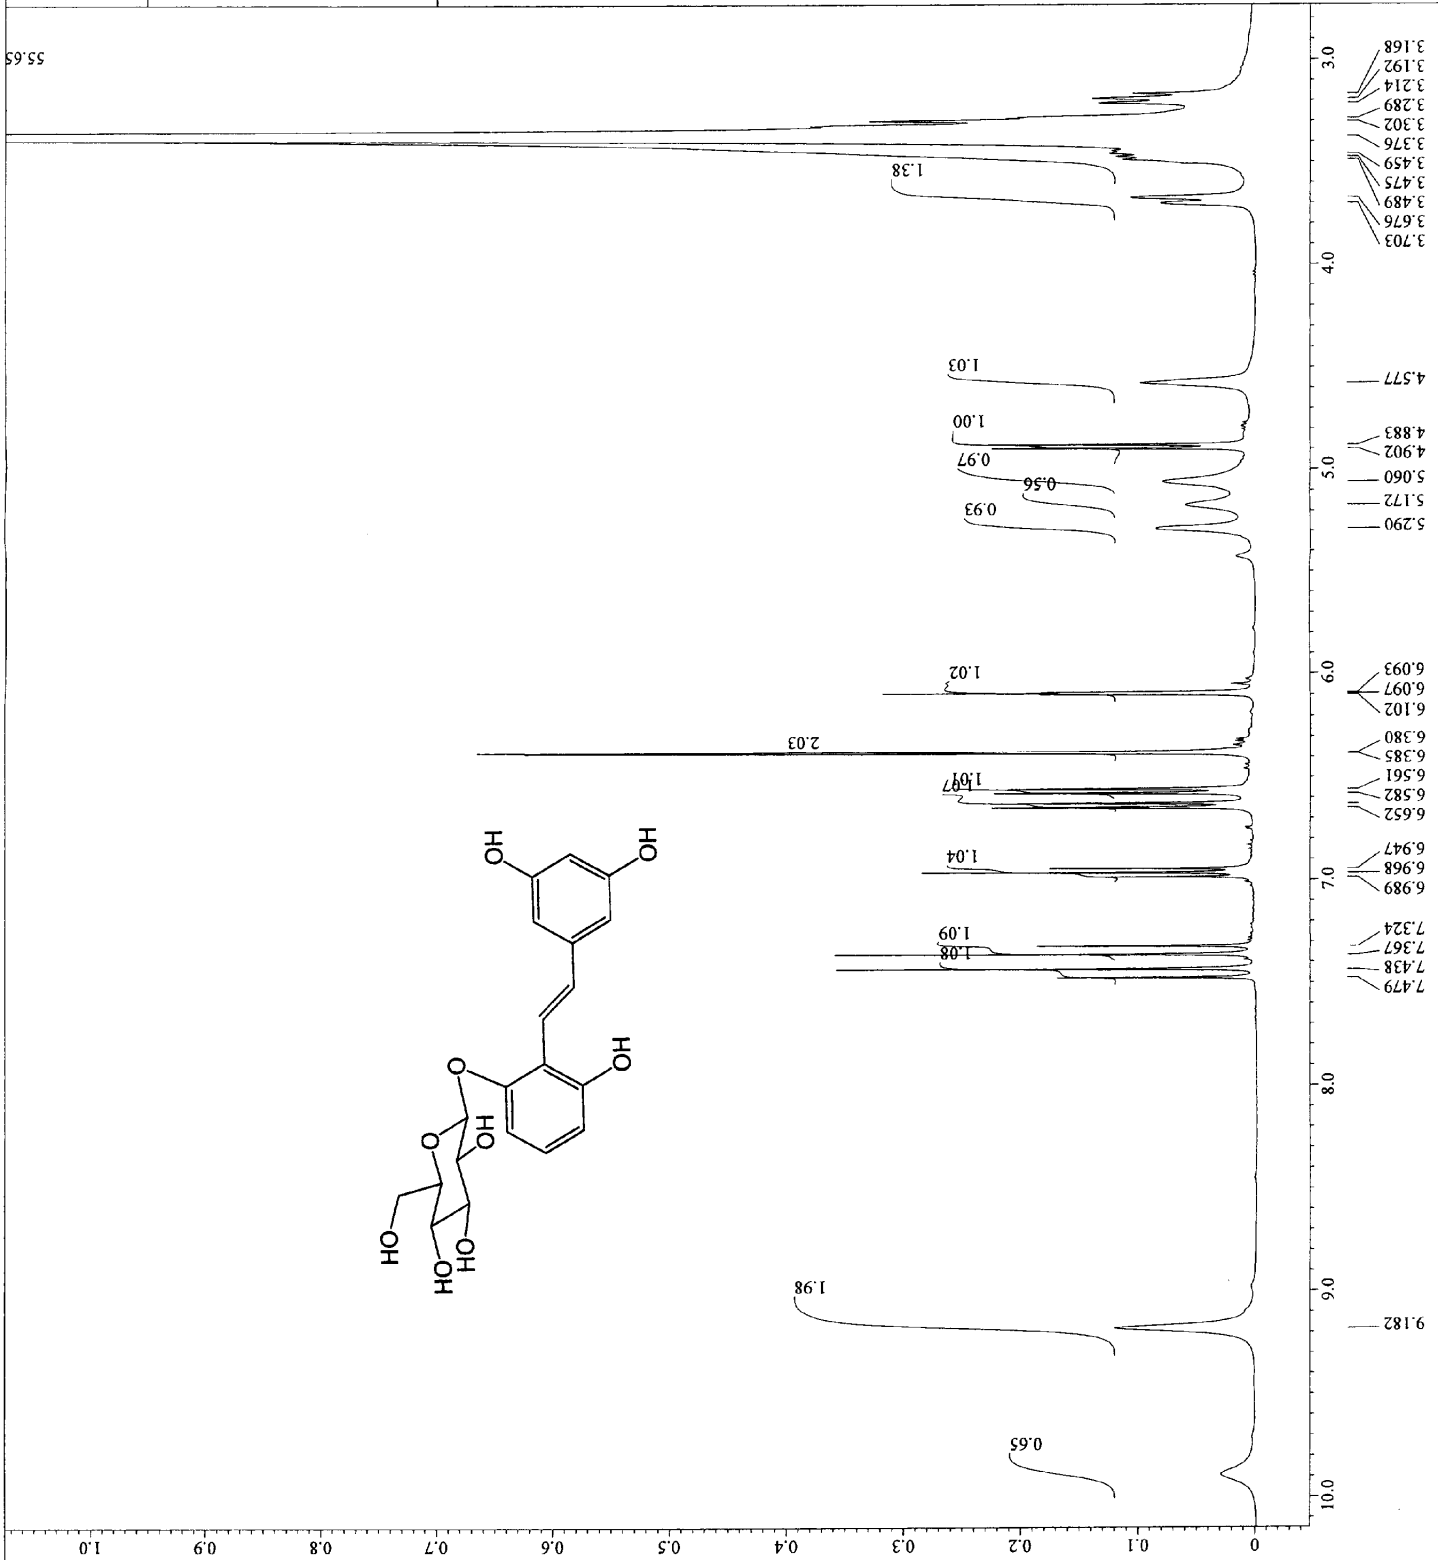

Supplement: s1 [file s1]
